# Supplementary material for: The Transcriptional Heat Shock Response of Salmonella Typhimurium Shows Hysteresis and Heated Cells Show Increased Resistance to Heat and Acid Stress
Source: PubMed Central journal article supplement (PMC3517412; doi:10.1371/journal.pone.0051196), 2012-12-07
Supplement: pone.0051196.s005.pdf [file pone.0051196.s005.pdf]

Table S1: Number of replicated samples in which genes were up- or down- regulated because of heat stress (45°C)

| Gene name | Equivalent samples before stress (25°C) | 30 min under stress (45°C) | Immediately after removing stress | 30 min after removing stress |
|-----------|-----------------------------------------|----------------------------|-----------------------------------|------------------------------|
| ackA      |                                         | -3                         |                                   |                              |
| acnA      |                                         | -3                         |                                   | -1                           |
| acnB      |                                         | -3                         |                                   |                              |
| acrA      |                                         |                            | 2                                 |                              |
| add       |                                         |                            | 2                                 | 1                            |
| adk       | 1                                       |                            | 3                                 | 3                            |
| aer       |                                         | -2                         | -2                                | -1                           |
| aes       |                                         |                            | 2                                 | 1                            |
| agp       |                                         | -3                         | -3                                | -1                           |
| agsA      |                                         | 3                          | 3                                 | 3                            |
| ahpF      |                                         |                            | 2                                 |                              |
| aldB      |                                         | -3                         | -3                                | -2                           |
| ansB      |                                         | -3                         | -2                                |                              |
| araC      |                                         |                            | 2                                 | 3                            |
| arcA      |                                         |                            | 3                                 |                              |
| aroH      | 1                                       |                            |                                   | 2                            |
| aroK      |                                         |                            | 3                                 |                              |
| aroL      |                                         |                            | 2                                 |                              |
| asd       |                                         |                            | 2                                 |                              |
| asnS      |                                         | 1                          | 3                                 | 3                            |
| aspA      |                                         | -3                         | -1                                |                              |
| atpB      |                                         |                            | 2                                 |                              |
| avrA      |                                         | 2                          |                                   |                              |
| bioA      | 1                                       |                            | 3                                 | 3                            |
| bioB      |                                         |                            | 3                                 | 3                            |
| bioC      |                                         |                            |                                   | 3                            |
| bioD      |                                         |                            |                                   | 3                            |
| bioF      |                                         |                            | 2                                 | 3                            |
| brnQ      |                                         |                            | 2                                 | 1                            |
| cbiC      |                                         | -3                         |                                   |                              |
| cbiF      |                                         | -3                         | -2                                | -1                           |
| cbiG      |                                         | -3                         |                                   |                              |
| cbiH      |                                         | -3                         | -1                                | -1                           |
| cbiJ      |                                         | -3                         | -1                                | -1                           |
| cbiK      |                                         | -3                         | -2                                | -2                           |
| cbiL      |                                         | -3                         | -1                                | -1                           |
| cbiM      |                                         | -3                         | -2                                | -1                           |
| cbiN      |                                         | -3                         | -1                                | -1                           |
| cbiO      |                                         | -3                         |                                   | -1                           |
| cbiP      |                                         | -2                         |                                   |                              |
| cboQ      |                                         | -3                         |                                   | -2                           |
| cbpA      |                                         | -2                         |                                   |                              |
| ccmB      |                                         |                            | 2                                 | 1                            |

|      |    |    |    |
|------|----|----|----|
| ccmC |    | 2  | 1  |
| ccmE |    | 2  | 1  |
| cdd  | 1  | 3  | 3  |
| celG | 1  | 2  |    |
| cheB | -2 | -1 | -3 |
| cheM | -3 | -3 |    |
| cheR | -3 | -2 |    |
| cheW | -2 |    | -2 |
| cheY | -3 | -1 | -3 |
| cheZ | -2 |    | -3 |
| citG | 1  | 2  | 2  |
| clpB | 3  | 3  | 3  |
| clpP | 1  | 3  | 3  |
| clpX |    | 3  | 2  |
| cobS | -2 |    |    |
| creA | 1  | 3  | 3  |
| creB | 1  | 3  | 3  |
| creC |    | 3  | 2  |
| crp  | -2 | -1 |    |
| csdA |    | 3  | 1  |
| csiE | -3 | -1 |    |
| cspA | 2  | 3  | 1  |
| cspC | -3 |    |    |
| cspE | -3 |    |    |
| csrA | -2 |    |    |
| cstA | -3 | -1 |    |
| cydA | -3 |    |    |
| cydB | -3 |    |    |
| cyoA |    | 2  | 1  |
| cyoB |    | 2  |    |
| cypD |    | 3  |    |
| dapA | -3 |    |    |
| dapD | -3 |    |    |
| dcd  |    | 2  |    |
| dctA | -3 | -2 | -1 |
| dcuA | -3 |    |    |
| deaD |    | 3  | 3  |
| def  |    | 3  |    |
| deoC |    | 3  |    |
| dgoT | -3 | -1 |    |
| dnaC |    | 2  | 1  |
| dnaG | 1  | 3  | 3  |
| dnaJ | 3  | 3  | 3  |
| dnaK | 3  | 3  | 3  |
| dnaX |    | 2  |    |
| dppA | -3 | -2 | -3 |
| dps  | -3 |    | -2 |
| dxs  |    | 2  |    |

|      |   |    |    |    |
|------|---|----|----|----|
| ecnB |   | -1 |    | -2 |
| eco  |   | -3 |    |    |
| eda  |   |    | 2  |    |
| emrA |   |    | 3  | 2  |
| emrD | 1 |    | 2  |    |
| emrR |   |    | 3  | 2  |
| eutA |   | -1 | -1 | -3 |
| eutB |   | -3 | -2 | -3 |
| eutC |   | -3 |    | -3 |
| eutD |   | -3 | -3 | -3 |
| eutE |   | -2 | -2 | -3 |
| eutG |   | -1 | -1 | -3 |
| eutH |   | -1 |    | -3 |
| eutJ |   | -3 | -3 | -3 |
| eutK |   | -3 | -2 | -3 |
| eutL |   | -3 | -2 | -3 |
| eutM |   | -3 | -3 | -3 |
| eutN |   | -3 | -3 | -3 |
| eutP |   | -3 | -3 | -3 |
| eutQ |   | -3 | -3 | -3 |
| eutR |   | -1 |    | -3 |
| eutS |   | -1 |    | -2 |
| eutT |   | -3 |    | -1 |
| fabF |   |    | 2  | 1  |
| fba  |   | -3 |    |    |
| fbp  |   | -2 |    |    |
| fdhE |   | -3 |    |    |
| fdhF |   | -2 |    |    |
| fdoG |   | -3 |    |    |
| fdoH |   | -3 |    |    |
| fdoI |   | -3 | -1 |    |
| fepE |   |    | 2  | 1  |
| fimA |   | -2 | -3 | -3 |
| fkpA |   |    | 2  |    |
| fldA |   |    | 3  |    |
| fldB |   |    | 2  | 1  |
| flgK |   | -3 | -2 |    |
| flgL |   | -3 | -1 |    |
| flgM |   | -3 | -2 |    |
| flgN |   | -3 | -2 |    |
| fliC |   | -3 | -3 | -3 |
| fliH |   |    | 1  | 3  |
| fliS |   | -1 |    | -2 |
| fliT |   | -1 |    | -2 |
| fljB |   | -3 | -3 | -3 |
| flk  |   |    | 2  | 1  |
| fnt  |   |    | 3  |    |
| fnr  |   |    | 3  |    |

|      |    |    |    |
|------|----|----|----|
| folD |    | 2  |    |
| folE |    | 3  |    |
| frdC | -2 |    |    |
| ftn  |    | 2  | 1  |
| ftsI | -3 | -1 |    |
| fumA | -3 | -3 | -1 |
| fumC | -3 | -2 | -1 |
| fur  |    | 3  | 1  |
| fusA | 1  | 3  | 3  |
| fxsA |    | 3  |    |
| galF |    | 3  | 1  |
| galK | -2 |    |    |
| galM | -3 |    | -1 |
| galP | -3 | -2 | -3 |
| galT | -3 |    |    |
| gapA | 1  | 3  | 2  |
| gcvA |    | 3  | 1  |
| gcvH | -3 |    |    |
| gcvT | -2 |    |    |
| glgC | -3 |    | -1 |
| glgX | -3 |    |    |
| glmU |    | 3  | 3  |
| glnA |    | 1  | 3  |
| glnL |    |    | 3  |
| glnS |    | 3  | 3  |
| glpX |    |    | 2  |
| gltA | -3 |    |    |
| gltI | -3 | -3 | -3 |
| gltJ | -3 | -3 | -2 |
| gltK | -3 | -3 | -3 |
| gltX |    | 3  | 1  |
| glyQ |    | 2  |    |
| gmk  |    | 3  |    |
| gntU |    |    | 2  |
| gpt  |    | 3  | 1  |
| greA |    | 3  |    |
| greB |    | 2  | 1  |
| grpE |    | 3  | 2  |
| grxB | -3 |    |    |
| gsp  |    | 2  | 1  |
| guaB |    | 2  | 3  |
| gutM |    | 3  |    |
| gyrA |    | 3  | 2  |
| gyrB |    |    | 2  |
| hemA |    | 2  |    |
| hemB |    | 2  |    |
| hemL |    | 3  |    |
| hemX | -3 |    |    |

1

|      |   |    |    |    |
|------|---|----|----|----|
| hepA |   | 1  | 3  | 2  |
| hflB |   |    | 3  | 3  |
| hha  |   |    | 2  |    |
| hilD |   | -3 | -2 | -3 |
| hisB |   |    | 1  | 3  |
| hisC |   |    | 1  | 3  |
| hisD |   | 1  | 3  | 3  |
| hisG |   | 1  | 3  | 3  |
| hisH |   |    | 1  | 3  |
| hisI |   |    |    | 2  |
| hlpA |   | -3 |    |    |
| holB |   |    | 2  |    |
| holC |   | 1  | 3  | 3  |
| holD |   |    | 2  | 1  |
| hrpA |   |    | 2  | 1  |
| hscB |   |    | 3  | 3  |
| hslU |   |    | 3  | 3  |
| hslV |   | 1  | 3  | 3  |
| htpG | 1 | 3  | 3  | 3  |
| htpX |   | 2  | 3  | 3  |
| htrB |   |    | 2  | 1  |
| hupA |   | -3 |    |    |
| hybA |   | -3 | -1 |    |
| hybB |   | -3 |    |    |
| hybC |   | -3 |    |    |
| hybD |   | -3 |    |    |
| hybE |   | -3 |    |    |
| hybF |   | -3 |    |    |
| hycE |   |    |    | -2 |
| hycH |   | -2 |    | -2 |
| hydN |   | -2 |    | -2 |
| hypA |   | -2 |    |    |
| hypB |   | -3 |    |    |
| hypC |   | -3 |    |    |
| hypD |   | -3 |    |    |
| hypO |   | -3 |    |    |
| iadA |   |    | 1  | 3  |
| iap  |   |    | 2  | 1  |
| ibpA |   | 3  | 3  | 3  |
| ibpB |   | 3  | 3  | 3  |
| icdA |   | -3 |    |    |
| idnD |   | -1 | -1 | -2 |
| idnO |   | -2 | -3 | -2 |
| idnT |   | -1 | -2 | -1 |
| ileS |   |    |    | 3  |
| ilvY |   |    | 3  | 3  |
| infA |   |    | 2  | 1  |
| infC |   | -3 |    |    |

|      |    |    |    |
|------|----|----|----|
| invB | -2 |    | -3 |
| invF | -3 | -3 | -3 |
| invG |    |    | -2 |
| invH | -3 |    | -3 |
| invI | -1 |    | -3 |
| invJ |    |    | -3 |
| ispA |    | 2  |    |
| katE | -3 | -1 | -1 |
| katG | -3 |    |    |
| kdsB |    | 3  | 1  |
| kdtB |    | 2  | 3  |
| ldhA | 2  | 3  | 3  |
| leuS |    | 2  |    |
| lipA | -2 |    |    |
| lipB |    | 3  | 1  |
| lon  | 1  | 3  | 3  |
| lppB |    | 2  | 1  |
| lpxD | -3 |    |    |
| lrhA |    | 3  | 3  |
| lspA |    |    | 3  |
| lysA |    |    | 2  |
| maa  |    | 3  | 1  |
| malE | -2 |    |    |
| marA | 2  | 3  | 3  |
| marB | 1  | 3  | 3  |
| marR | 1  | 3  | 3  |
| mdh  | -3 |    |    |
| mdoG |    | 3  |    |
| melA | -3 | -3 | -3 |
| melB | -3 | -3 | -3 |
| menA |    |    | 2  |
| mglB | -3 | -3 | -1 |
| mlc  |    | 1  | 2  |
| mopA | 3  | 3  | 3  |
| mopB | 3  | 3  | 3  |
| motA | -2 |    |    |
| motB | -2 | -1 |    |
| mreB |    | 3  |    |
| mrsA | 3  | 3  | 3  |
| mtlA |    | 1  | 3  |
| mtlR |    |    | 2  |
| mutH |    | 3  | 1  |
| mutM | 1  | 3  | 3  |
| nagC |    | 2  | 1  |
| nagD |    | 2  | 2  |
| narP |    | 3  | 1  |
| nifS | 1  | 3  | 3  |
| nifU |    | 3  | 3  |

|        |    |    |    |
|--------|----|----|----|
| nmpC   | -3 | -3 | -3 |
| nuoA   | -3 |    |    |
| nuoB   | -3 |    |    |
| nuoC   | -3 |    |    |
| nuoE   | -3 |    |    |
| nuoF   | -3 | -1 |    |
| nuoG   | -3 |    |    |
| nuoH   | -3 |    |    |
| nusA   |    | 1  | 3  |
| ompC   | -3 | -2 | -1 |
| ompW   | -3 |    |    |
| oppA   | -3 |    |    |
| orf242 |    | 3  | 1  |
| orgA   | -2 |    | -3 |
| osmC   | -3 |    | -2 |
| osmE   | -3 | -2 | -3 |
| osmY   | -3 | -1 | -3 |
| pckA   | -3 | -2 | -1 |
| pcnB   |    | 2  | 1  |
| pdhR   |    | 3  |    |
| pduA   | -2 |    |    |
| pduB   | -3 |    |    |
| pduC   | -3 | -3 |    |
| pduD   | -3 | -3 |    |
| pduE   | -3 | -3 |    |
| pduG   | -3 | -3 |    |
| pduH   | -2 |    |    |
| pduJ   | -3 | -2 | -2 |
| pduK   | -3 | -2 | -2 |
| pduL   | -3 | -2 | -1 |
| pduM   | -3 | -2 |    |
| pduN   | -3 | -1 |    |
| pduO   | -3 |    |    |
| pduP   | -3 | -1 |    |
| pduQ   | -3 | -1 |    |
| pduS   | -3 | -1 |    |
| pduT   | -3 | -1 |    |
| pduU   | -3 | -1 |    |
| pduV   | -3 |    |    |
| pduW   | -3 |    | -1 |
| pdxB   |    | 2  | 1  |
| pdxH   |    | 2  |    |
| pdxK   | 1  | 2  |    |
| pepD   | -3 |    |    |
| pepT   |    | 2  | 1  |
| pfkB   | -2 |    |    |
| pflA   |    | 3  |    |
| pflB   | -3 |    |    |

|      |    |    |    |
|------|----|----|----|
| pfs  |    | 2  | 1  |
| pheS |    | 3  | 2  |
| phnR |    | 2  | 1  |
| phoH | -3 |    | -1 |
| phoL | 1  | 3  | 3  |
| phoP | -2 |    |    |
| phsB | -2 |    |    |
| pipC | -1 | -1 | -2 |
| pldA |    | 2  |    |
| pmgI |    |    | 3  |
| pncB |    |    | 2  |
| polB | 1  | 2  |    |
| potC | 2  | 3  | 2  |
| potD | 3  | 3  | 3  |
| potE | -3 | -3 | -3 |
| poxB | -2 |    | -2 |
| ppa  |    | 2  |    |
| pphB |    | 2  |    |
| ppiA |    | 3  | 1  |
| prfA |    | 3  | 1  |
| prgI | -3 | -3 | -3 |
| prgJ | -2 | -1 | -3 |
| prgk | -3 | -2 | -3 |
| prlC | 2  | 3  | 3  |
| proQ |    | 3  | 1  |
| proS |    | 2  |    |
| prsA |    | 2  |    |
| psiF | -3 |    | -2 |
| pspA | 3  | 3  |    |
| pspB | 3  | 3  |    |
| pspC | 3  | 3  |    |
| pspD | 3  | 3  |    |
| pta  | -3 |    |    |
| purF | 1  | 2  |    |
| purG |    | 2  |    |
| purU |    | 3  |    |
| pykF | -3 |    | -1 |
| pyrF | 1  | 2  | 1  |
| pyrG |    | 3  | 1  |
| rbsB | -3 | -1 |    |
| rbsD |    |    | 3  |
| rscF |    | 3  | 1  |
| recA |    | 3  | 3  |
| recF |    | 3  | 3  |
| rfaH |    | 2  | 1  |
| rhlB |    | 2  |    |
| ribA |    | 3  | 1  |
| ribD |    | 3  | 3  |



|        |    |    |    |
|--------|----|----|----|
| rimI   | 1  | 3  | 1  |
| rnpA   |    | 3  |    |
| rob    |    | 2  |    |
| rplA   |    | 2  | 1  |
| rplB   | 1  | 3  | 2  |
| rplC   |    | 3  | 1  |
| rplD   | 1  | 3  | 2  |
| rplK   |    | 3  |    |
| rplM   |    | 2  | 1  |
| rplN   |    | 3  | 1  |
| rplT   | -2 |    |    |
| rplU   |    | 3  | 1  |
| rplW   | 1  | 3  | 1  |
| rpmA   |    | 3  | 1  |
| rpmB   |    | 2  |    |
| rpmE   | 3  | 3  | 3  |
| rpmG   |    | 2  |    |
| rpmH   |    | 3  |    |
| rpoD   | 1  | 3  | 3  |
| rpoE   |    | 2  |    |
| rpoH   | 3  | 3  | 2  |
| rpoZ   |    | 2  |    |
| rpsA   | 2  | 3  | 1  |
| rpsB   | 2  | 3  | 1  |
| rpsF   |    | 2  |    |
| rpsG   | 2  | 3  | 3  |
| rpsJ   | 1  | 3  | 2  |
| rpsL   | 2  | 3  | 3  |
| rpsT   |    | 2  | 1  |
| rseA   |    | 3  |    |
| rseB   |    | 3  |    |
| rstA   |    | 2  |    |
| rsuA   |    | 3  | 1  |
| rtcR   |    | 2  | 1  |
| ruvA   |    | 2  | 1  |
| sdaA   |    | 3  | 1  |
| sdhA   | -3 |    |    |
| sdhB   | -3 |    |    |
| sdhC   | -3 |    |    |
| sdhD   | -3 |    |    |
| serC   |    | 2  |    |
| sicA   | -1 |    | -2 |
| sipB   | -3 | -2 | -3 |
| sipC   | -2 | -2 | -3 |
| SL0322 | -3 | -2 |    |
| SL0351 | -3 |    | -3 |
| SL0555 |    | 3  |    |
| SL0560 | -3 | -3 | -3 |

|        |    |    |    |
|--------|----|----|----|
| SL0561 | -3 | -1 | -3 |
| SL0562 | -3 | -2 | -2 |
| SL0563 | -3 | -3 | -3 |
| SL0564 | -3 | -3 | -3 |
| SL0565 | -3 | -2 | -2 |
| SL0568 |    | 2  |    |
| SL0681 | -3 | -3 | -3 |
| SL0713 | -3 |    |    |
| SL0794 | -3 |    |    |
| SL0846 |    | 2  |    |
| SL0950 |    | 2  | 1  |
| SL0983 | -2 |    |    |
| SL1174 |    | 3  | 2  |
| SL1235 | -2 |    |    |
| SL1259 | -3 |    |    |
| SL1391 |    | 3  |    |
| SL1399 | -3 | -2 |    |
| SL1475 |    |    | 2  |
| SL1476 | 2  | 3  | 1  |
| SL1478 |    | 3  | 1  |
| SL1479 | 1  | 3  | 1  |
| SL1480 | 1  | 3  |    |
| SL1537 |    | 3  | 1  |
| SL1557 |    | 3  | 3  |
| SL1558 |    | 3  |    |
| SL1596 | 2  | 1  |    |
| SL1603 |    | 3  | 3  |
| SL1604 | 1  | 3  | 2  |
| SL1605 |    | 3  | 3  |
| SL1664 |    | 3  | 1  |
| SL1721 | 1  | 1  | 2  |
| SL1723 | -3 | -2 |    |
| SL1987 |    | 3  |    |
| SL1988 |    | 2  |    |
| SL2125 |    | 2  | 3  |
| SL2157 |    | 3  | 1  |
| SL2163 | -3 |    |    |
| SL2283 | -3 | -2 |    |
| SL2330 |    | 2  | 3  |
| SL2341 | -3 |    | -1 |
| SL2409 |    | 3  | 1  |
| SL2507 |    | 3  |    |
| SL2574 | 1  | 3  |    |
| SL2593 |    | 3  | 1  |
| SL2594 |    | 2  |    |
| SL2631 |    | 3  |    |
| SL2632 |    | 2  |    |
| SL2633 |    | 3  |    |

|        |   |    |    |    |
|--------|---|----|----|----|
| SL2674 |   |    | -1 | -3 |
| SL2723 |   | -3 | -3 |    |
| SL2724 |   | -3 | -1 |    |
| SL2733 |   |    | 2  | 1  |
| SL2763 |   | 2  | 3  |    |
| SL2781 |   |    | 2  |    |
| SL2784 |   |    | 3  |    |
| SL2850 |   |    |    | -3 |
| SL2884 |   | 2  | 3  | 2  |
| SL2885 |   | 1  | 3  | 1  |
| SL2919 |   | -3 | -2 |    |
| SL2921 |   | -3 | -2 |    |
| SL2966 |   |    | 2  |    |
| SL2998 |   |    | 2  | 1  |
| SL3011 |   |    | 3  | 1  |
| SL3012 |   |    | 3  | 1  |
| SL3056 |   |    |    | 3  |
| SL3057 |   | 1  | 3  | 3  |
| SL3058 |   | 1  | 3  | 3  |
| SL3059 | 1 | 3  | 3  | 3  |
| SL3109 |   |    | 2  |    |
| SL3110 |   |    | 2  |    |
| SL3128 |   | 1  | 2  |    |
| SL3143 |   | 3  | 3  | 3  |
| SL3144 |   |    |    | 3  |
| SL3149 | 1 |    | 2  | 1  |
| SL3219 | 1 |    |    | 2  |
| SL3226 |   | -3 | -3 | -3 |
| SL3227 |   | -3 | -3 | -3 |
| SL3228 |   | -3 | -3 | -3 |
| SL3229 |   | -3 | -3 | -3 |
| SL3230 |   | -3 | -3 | -3 |
| SL3231 |   | -3 | -3 | -3 |
| SL3232 |   | -3 |    | -3 |
| SL3233 |   | -2 | -1 | -3 |
| SL3234 |   |    |    | -3 |
| SL3334 | 1 | 1  | 3  | 2  |
| SL3378 |   | 1  | 3  | 3  |
| SL3524 |   | 2  | 3  |    |
| SL3566 |   | -3 |    |    |
| SL3617 |   |    | 3  |    |
| SL3618 |   |    | 3  |    |
| SL3743 | 1 | 3  | 2  |    |
| SL3744 |   | 2  | 2  |    |
| SL3750 |   |    |    | 2  |
| SL3786 |   | 1  | 2  |    |
| SL3808 | 1 |    | 3  |    |
| SL3867 |   | 1  | 3  |    |

|           |   |    |    |    |
|-----------|---|----|----|----|
| SL3976    |   | 3  | 3  |    |
| SL3977    |   | 3  | 1  |    |
| SL3979    |   | 1  | 2  |    |
| SL3985    |   | -2 |    |    |
| SL3993    |   | -3 | -3 | -1 |
| SL4014    | 1 | 2  | 3  | 3  |
| SL4015    |   | 1  | 3  | 3  |
| SL4016    |   |    | 1  | 3  |
| SL4020    |   | -3 | -3 | -3 |
| SL4029    |   | -3 | -3 | -3 |
| SL4222    |   | -2 |    |    |
| SL4253    |   | 1  | 2  |    |
| SL4395    |   | -3 | -2 |    |
| SL4396    |   | -3 | -2 |    |
| SL4397    |   | -3 | -1 |    |
| SL4421    |   |    | 3  | 1  |
| SL4422    |   |    | 2  |    |
| SL4426    |   |    | 2  | 1  |
| SL4441    |   | 1  | 3  | 3  |
| SL4460    |   | 2  | 3  |    |
| SL4466    |   | -3 | -3 |    |
| SL4467    |   | -3 | -3 | -1 |
| SL4468    |   | -3 | -3 | -1 |
| SL4469    |   | -3 | -3 | -3 |
| SL4470    |   | -3 | -3 | -3 |
| SL4471    |   | -3 | -3 | -3 |
| SLP1_0008 |   |    | 2  |    |
| SLP1_0009 |   | 2  | 2  |    |
| SLP1_0054 |   |    | 3  | 3  |
| SLP1_0055 |   |    | 3  | 3  |
| SLP1_0056 |   | 1  | 2  |    |
| SLP1_0057 |   | 2  | 3  | 3  |
| SLP1_0058 |   | 3  | 3  | 3  |
| SLP1_0059 |   | 3  | 3  | 2  |
| SLP1_0060 |   | 1  | 3  | 3  |
| SLP1_0062 |   |    | 3  |    |
| SLP1_0063 |   | 1  | 3  |    |
| SLP1_0072 |   |    | 3  |    |
| SLP1_0074 |   |    |    | 2  |
| SLP1_0075 |   | 1  | 3  | 3  |
| SLP1_0076 |   |    | 3  | 3  |
| SLP1_0077 |   | 1  | 3  | 3  |
| SLP1_0079 |   | 3  | 3  | 3  |
| SLP1_0080 |   | 3  | 3  | 3  |
| SLP1_0083 |   |    | 2  |    |
| SLP1_0091 |   |    | 3  |    |
| SLP1_0092 |   |    | 3  | 2  |
| SLP1_0093 | 1 |    | 2  | 2  |

|           |   |    |    |    |
|-----------|---|----|----|----|
| SLP1_009  | 1 |    |    | 2  |
| SLP2_0003 |   | 1  | 3  |    |
| SLP2_0004 |   | 3  | 3  |    |
| SLP2_0005 |   |    | 3  |    |
| SLP2_0010 |   |    | 2  |    |
| SLP2_0016 |   |    | 3  | 3  |
| SLP2_0017 | 1 | 1  | 3  | 3  |
| SLP2_0019 |   | 1  | 2  |    |
| SLP2_0020 |   | 3  | 3  | 1  |
| SLP2_0021 |   | 3  | 3  | 3  |
| SLP2_0022 |   | 3  | 3  | 3  |
| SLP2_0023 |   |    | 3  | 2  |
| SLP2_0024 |   |    | 2  | 1  |
| SLP2_0027 | 1 |    |    | 2  |
| SLP2_0048 |   |    | 3  | 2  |
| SLP2_0049 |   |    | 3  | 2  |
| SLP2_0055 |   | 3  | 3  |    |
| SLP2_0071 | 1 |    |    | 2  |
| SLP2_0095 |   |    |    | 2  |
| SLP2_0098 |   |    |    | 2  |
| SLP3_0001 |   |    | 2  |    |
| SLP3_0003 |   | 1  | 3  | 3  |
| SLP3_0004 |   | 2  | 3  | 3  |
| SLP3_0005 |   | 2  | 3  | 3  |
| SLP3_0006 | 1 | 3  | 3  | 3  |
| SLP3_0007 |   | 3  | 3  | 3  |
| SLP3_0008 | 1 | 3  | 3  | 3  |
| SLP3_0009 | 1 | 3  | 3  | 3  |
| SLP3_0011 |   | 3  | 3  | 1  |
| SLP3_0012 | 1 |    | 2  | 1  |
| SLP3_0014 | 1 |    | 2  | 1  |
| slpA      |   |    |    | 2  |
| smpA      |   |    | 2  |    |
| smpB      |   |    | 2  |    |
| sodB      |   | -3 |    |    |
| sopB      |   |    |    | -3 |
| soxR      |   |    | 3  | 2  |
| spaO      |   | -1 |    | -3 |
| spaP      |   |    |    | -2 |
| speF      |   | -3 | -3 | -3 |
| speG      |   |    | 2  |    |
| sptP      |   | 1  | 2  |    |
| spy       |   | 1  | 3  |    |
| srlR      |   |    | 2  |    |
| sseE      |   |    | 2  |    |
| stpA      |   | 3  | 3  | 3  |
| sucA      |   | -3 |    | -1 |
| sucB      |   | -3 | -1 | -1 |

|      |   |    |    |    |
|------|---|----|----|----|
| sucC |   | -3 |    | -1 |
| sucD |   | -3 |    | -1 |
| suhB | 1 |    | 2  | 1  |
| tatA |   |    | 2  | 1  |
| tatB |   |    | 2  |    |
| tbpA |   | 1  | 2  |    |
| tcp  |   | -3 | -3 | -3 |
| tesB |   |    | 2  | 1  |
| thiL | 1 |    | 2  |    |
| thrS |   | -3 |    |    |
| tktB |   | -2 |    | -1 |
| tmk  |   |    | 3  |    |
| tolC |   | -3 |    |    |
| tolQ | 1 |    | 3  | 1  |
| topA | 1 |    | 2  |    |
| torR |   |    | 3  | 3  |
| tpx  |   | -2 |    |    |
| treA |   | -3 | -1 | -1 |
| treR |   |    | 2  |    |
| trxA |   |    | 2  | 1  |
| trxB |   |    | 3  |    |
| trxC |   |    | 2  | 1  |
| tsf  |   |    | 3  | 1  |
| tus  |   | 1  | 3  | 1  |
| typA |   |    | 3  | 1  |
| ubiC |   |    | 2  |    |
| ubiG |   |    | 2  |    |
| ucpA |   | -3 | -2 |    |
| udk  |   |    | 3  | 1  |
| uvrA |   |    | 1  | 3  |
| uvrC | 1 |    | 3  | 2  |
| uvrY |   |    | 2  | 1  |
| uxuR |   |    | 2  |    |
| valS |   |    |    | 3  |
| wcaI |   |    |    | 2  |
| wraB |   |    |    | -2 |
| xseA |   |    | 3  | 3  |
| yaaA |   |    | 2  | 1  |
| yacC |   |    | 3  | 1  |
| yacE | 1 |    | 3  | 1  |
| yacF |   |    | 2  |    |
| yadF | 1 |    | 2  | 1  |
| yadR |   |    | 3  | 1  |
| yaeB |   |    | 3  |    |
| yaeH |   | -3 |    | -1 |
| yaeQ |   |    | 2  | 1  |
| yafA |   |    | 2  |    |
| yafD |   |    | 3  | 1  |

|         |   |    |    |    |
|---------|---|----|----|----|
| yafK    | 1 |    | 3  | 1  |
| yahO    |   | -2 |    |    |
| yaiI    |   |    | 3  |    |
| yajO    |   | -3 | -2 | -1 |
| ybaD    |   |    | 3  | 2  |
| ybaJ    |   |    | 2  |    |
| ybaM    |   |    | 2  |    |
| ybaO    |   |    | 3  | 1  |
| ybaY    |   | -2 | -2 | -3 |
| ybbB    |   |    | 2  |    |
| ybbM    | 1 |    | 3  | 2  |
| ybbN    |   | 3  | 3  | 3  |
| ybbO    |   |    | 2  |    |
| ybdD    |   | -3 |    |    |
| ybdF    |   |    | 2  |    |
| ybdG    |   |    | 2  | 1  |
| ybdN    |   | 1  | 2  |    |
| ybeA    |   |    | 3  | 1  |
| ybeB    |   |    | 3  |    |
| ybeD    |   | 1  | 3  | 3  |
| ybeL    |   | -2 |    |    |
| ybeX    |   |    | 3  | 3  |
| ybeY    |   |    | 3  | 3  |
| ybfA    |   | 1  | 3  | 2  |
| ybgE    |   | -3 |    |    |
| ybgS    |   | -1 |    | -2 |
| ybgT    |   | -2 |    |    |
| ybhQ    |   | -3 |    |    |
| ybiJ    |   | 1  | 3  | 3  |
| ybiS    |   |    | 2  |    |
| ybiV(1) |   |    | 3  |    |
| ycaR    |   |    | 3  | 1  |
| yccA    |   |    | 2  | 1  |
| yccD    |   | -3 |    |    |
| yccJ    |   |    |    | -2 |
| yccS    |   |    | 2  | 1  |
| yccV    |   | 1  | 3  | 3  |
| yceG    |   |    | 3  |    |
| yceP    |   |    | 2  | 1  |
| ycfD    |   |    | 2  |    |
| ycfF    |   | -2 |    |    |
| ycfL    |   | -2 |    |    |
| ycfQ    |   |    | 3  |    |
| ycfR    | 1 | 3  | 3  | 3  |
| ycgB    |   | -3 |    | -1 |
| ychF    |   |    | 3  | 1  |
| yciM    |   |    | 3  | 1  |
| yciS    |   |    | 3  | 1  |

|      |   |    |    |    |
|------|---|----|----|----|
| yciT | 1 |    | 2  |    |
| ycjF |   |    | 3  | 3  |
| ycjX |   | 2  | 3  | 3  |
| ydaL |   |    | 3  | 1  |
| ydbH |   | 1  | 3  | 1  |
| ydcX |   |    | 3  |    |
| ydeA | 1 |    | 3  | 1  |
| ydeV |   | -3 | -3 | -1 |
| ydeW |   | -3 | -2 |    |
| ydeY |   | -3 | -2 | -1 |
| ydeZ |   | -3 | -3 | -3 |
| ydfH |   | -2 |    |    |
| ydfZ |   | 3  | 3  | 1  |
| ydgA |   | -3 |    |    |
| ydgM |   |    | 2  |    |
| ydgO |   |    |    | 2  |
| ydhC |   |    | 2  |    |
| ydiH |   |    | 3  | 2  |
| ydiZ |   | -2 |    |    |
| yeaD |   |    | 3  | 3  |
| yeaG |   | -3 | -2 | -1 |
| yeaH |   | -3 | -1 | -1 |
| yeaM |   |    | 2  |    |
| yeaO |   | 1  | 2  | 1  |
| yebK |   |    | 1  | 2  |
| yecG |   | -3 |    |    |
| yecH |   |    | 1  | 2  |
| yedJ |   | 1  | 3  | 1  |
| yeeI |   | -3 |    |    |
| yegH |   |    | 3  | 2  |
| yegQ |   |    | 3  | 2  |
| yegT |   |    | 1  | 3  |
| yegU |   |    | 1  | 3  |
| yehE |   | 2  | 3  |    |
| yehS |   |    | 2  | 1  |
| yeiA |   | -3 |    |    |
| yeiH |   |    | 3  | 2  |
| yejG |   |    | 2  |    |
| yejH |   |    | 2  |    |
| yejL |   |    | 2  |    |
| yejM |   |    | 3  |    |
| yfbQ |   |    | 2  |    |
| yfcE |   |    | 3  |    |
| yfcL |   | 2  | 3  | 1  |
| yfcX |   |    | 3  | 2  |
| yfcZ |   | -3 | -2 |    |
| yfeC |   | -3 |    |    |
| yfeD |   | -2 |    |    |



|      |   |    |    |
|------|---|----|----|
| yfgB |   | 2  |    |
| yfhB |   | -2 |    |
| yfhF |   | 3  | 3  |
| yfhP |   | 1  | 3  |
| yfiO |   | 3  |    |
| yfjF |   | 2  |    |
| yfjG |   | 2  | 1  |
| ygaA |   | 2  | 3  |
| ygaC | 1 |    | 3  |
| ygaD |   | 1  | 3  |
| ygaU |   | -3 | -2 |
| ygbI |   | 2  | 1  |
| ygcF | 1 |    | 3  |
| ygcH |   | -3 |    |
| ygdD |   | 3  |    |
| ygdE |   | 3  | 1  |
| ygdH |   | -3 |    |
| ygdI |   | -3 | -2 |
| ygfB |   | 3  |    |
| ygfE |   | -3 |    |
| yghA |   | -3 | -3 |
| yghJ |   | -2 | -2 |
| ygiC |   | -3 | -1 |
| yhbC |   | 3  | 2  |
| yhbS |   | -2 |    |
| yhbU |   | 2  |    |
| yhcN |   | 1  | 3  |
| yhcO |   | -3 | 2  |
| yhdN |   | 1  | 3  |
| yheL |   | 2  | 3  |
| yheT |   |    | 3  |
| yheU |   | 2  | 2  |
| yhgI |   | 2  | 1  |
| yhhV |   | 3  | 3  |
| yhiI |   | 3  | 3  |
| yhiQ |   | 3  | 3  |
| yhiR |   | 2  |    |
| yhjC | 1 |    | 2  |
| yhjH |   | -2 | 1  |
| yhjT |   | 3  |    |
| yiaG |   | -3 | -2 |
| yidA |   | 3  | 3  |
| yigC |   | 2  |    |
| yihD |   | -2 |    |
| yiiL |   | -3 |    |
| yjbO |   | 2  | 1  |
| yjcB |   | 2  | 3  |
| yjfN |   | -3 | -2 |

|      |    |    |    |
|------|----|----|----|
| yjfO | -3 | -2 |    |
| yjiE |    | 2  | 3  |
| yjiG |    | 3  |    |
| yjiH |    | 3  |    |
| yjjY |    | 2  |    |
| ylaC |    | 2  |    |
| ymfC |    | 3  | 1  |
| ynaF | -3 | -2 | -3 |
| yneA | -3 | -3 | -3 |
| yneB | -3 | -3 | -3 |
| yneC | -3 | -3 | -3 |
| ynfK |    | 3  | 1  |
| yobF | -3 |    |    |
| yohJ |    | 3  | 1  |
| yohK | 1  | 3  | 2  |
| yqfA | -3 |    |    |
| yqiA |    | 2  | 1  |
| yqiB |    | 2  |    |
| yqiE | 1  | 3  | 1  |
| yqjC | -3 |    |    |
| yqjK | -3 |    | -1 |
| yrbL |    |    | 2  |
| yrdC | -3 |    |    |
| yrfH | 1  | 3  | 3  |
| yrfI | 1  | 3  | 3  |
| ytfH | 1  | 3  | 1  |
| ytfL |    | 3  | 2  |
| zntR | 3  | 3  | 3  |
| znuC |    | 3  | 1  |
